# Supplementary material
Source: HighWire-hosted journal article supplement (https://rmdopen.bmj.com/content/9/4/e003480)

## Supplementary Files

**Supplementary Table 1.** Prevalence of antibodies against AGE and MAA in healthy controls (n= 80) versus RA (n=648), non-RA (n=538), AI no RA (n=234) and non-AI (n=166) patient groups.

|                         | Anti-AGE              |               | Anti-MAA                |               |
|-------------------------|-----------------------|---------------|-------------------------|---------------|
|                         | aU/mL                 | n, % positive | aU/mL                   | n, % positive |
| <b>HC (n=80)</b>        | 94,2 [52,7 – 160,6]   | 6 (7,5)       | 358,4 [282,4 – 480,8]   | 3 (3,8)       |
| <b>RA (n=648)</b>       | 233,1 [130,4 – 367,4] | 289 (44,6)*   | 931,8 [663,2 – 1277,4]* | 299 (46,1)*   |
| <b>non-RA (n=538)</b>   | 177,8 [93,8 – 309,4]  | 177 (32,9)*   | 728,3 [485,1 – 1111,0]* | 163 (30,3)*   |
| <b>AI no RA (n=234)</b> | 192,6 [102,3 – 328,6] | 90 (38,5)*    | 853,7 [592,1 – 1246,5]* | 97 (41,5)*    |
| <b>non-AI (n=166)</b>   | 171,0 [107,2 – 286,4] | 46 (27,7)*    | 666,1 [485,5 – 922,4]*  | 33 (19,9)*    |

Results are presented as median [IQR] and n (%)

\* Statistically significant difference between patient group and healthy controls (p<0.001)

*Abbreviations: AGE, advanced glycation end-product; AI, Autoimmune (including psoriatic arthritis, paraneoplastic arthritis, SLE, sarcoidosis and spondyloarthritis); HC, Healthy controls; IQR, interquartile range; MAA, malondialdehyde-acetaldehyde adduct; non-AI, non-autoimmune (including septic arthritis, gout, pseudogout); RA rheumatoid arthritis.*

**Supplementary Table 2.** Association anti-AGE and anti-MAA responses with HLA-DRB1\*03 cross stratified for anti-AGE and anti-MAA for RA in part I and non-RA arthritis in part II.

| <b>Part I</b>    |                         | <b>RA<br/>n=648</b> |                     |              |             |                     |                |  |           |              |                |
|------------------|-------------------------|---------------------|---------------------|--------------|-------------|---------------------|----------------|--|-----------|--------------|----------------|
|                  |                         | <b>HLA-DRB1*03-</b> | <b>HLA-DRB1*03+</b> | <b>Total</b> | <b>OR</b>   | <b>95%CI</b>        | <b>p-value</b> |  | <b>OR</b> | <b>95%CI</b> | <b>p-value</b> |
| <b>Anti-AGE-</b> | <b>Healthy controls</b> | 941 (77.7%)         | 270 (22.3%)         | 1211         | 1 (ref)     | -                   | -              |  | -         | -            | -              |
|                  | <b>Anti-MAA-</b>        | 203 (75.5%)         | 66 (24.5%)          | 269          | 1.13        | (0.83, 1.54)        | 0.43           |  | -         | -            | -              |
|                  | <b>Anti-MAA+</b>        | 68 (75.6%)          | 22 (24.4%)          | 90           | 1.13        | (0.68, 1.86)        | 0.64           |  | -         | -            | -              |
|                  |                         | <b>HLA-DRB1.03-</b> | <b>HLA-DRB1.03+</b> | <b>Total</b> | <b>OR</b>   | <b>95%CI</b>        | <b>p-value</b> |  | <b>OR</b> | <b>95%CI</b> | <b>p-value</b> |
| <b>Anti-AGE+</b> | <b>Healthy controls</b> | 941 (77.7%)         | 270 (22.3%)         | 1211         | 1 (ref)     | -                   | -              |  | -         | -            | -              |
|                  | <b>Anti-MAA-</b>        | 63 (78.8%)          | 17 (21.3%)          | 80           | 0.94        | (0.54, 1.63)        | 0.83           |  | 1 (ref)   | -            | -              |
|                  | <b>Anti-MAA+</b>        | 148 (70.8%)         | 61 (29.2%)          | 209          | <b>1.44</b> | <b>(1.04, 1.99)</b> | <b>0.03</b>    |  | 1.53      | (0.83, 2.82) | 0.18           |
|                  |                         | <b>HLA-DRB1*03-</b> | <b>HLA-DRB1*03+</b> | <b>Total</b> | <b>OR</b>   | <b>95%CI</b>        | <b>p-value</b> |  | <b>OR</b> | <b>95%CI</b> | <b>p-value</b> |
| <b>Anti-MAA-</b> | <b>Healthy controls</b> | 941 (77.7%)         | 270 (22.3%)         | 1211         | 1 (ref)     | -                   | -              |  | -         | -            | -              |
|                  | <b>Anti-AGE-</b>        | 203 (75.5%)         | 66 (24.5%)          | 269          | 1.13        | (0.83, 1.54)        | 0.43           |  | -         | -            | -              |
|                  | <b>Anti-AGE+</b>        | 63 (78.8%)          | 17 (21.3%)          | 80           | 0.94        | (0.54, 1.63)        | 0.83           |  | -         | -            | -              |
|                  |                         | <b>HLA-DRB1.03-</b> | <b>HLA-DRB1.03+</b> | <b>Total</b> | <b>OR</b>   | <b>95%CI</b>        | <b>p-value</b> |  | <b>OR</b> | <b>95%CI</b> | <b>p-value</b> |
| <b>Anti-MAA+</b> | <b>Healthy controls</b> | 941 (77.7%)         | 270 (22.3%)         | 1211         | 1 (ref)     | -                   | -              |  | -         | -            | -              |
|                  | <b>Anti-AGE-</b>        | 68 (75.6%)          | 22 (24.4%)          | 90           | 1.13        | (0.68, 1.86)        | 0.64           |  | 1 (ref)   | -            | -              |
|                  | <b>Anti-AGE+</b>        | 148 (70.8%)         | 61 (29.2%)          | 209          | <b>1.44</b> | <b>(1.04, 1.99)</b> | <b>0.03</b>    |  | 1.27      | (0.72, 2.24) | 0.40           |

| Part II   |                  | non-RA<br>n=246 |              |       |             |                     |              |  |             |                     |             |
|-----------|------------------|-----------------|--------------|-------|-------------|---------------------|--------------|--|-------------|---------------------|-------------|
|           |                  | HLA-DRB1*03-    | HLA-DRB1*03+ | Total | OR          | 95%CI               | p-value      |  | OR          | 95%CI               | p-value     |
| Anti-AGE- | Healthy controls | 941 (77.7%)     | 270 (22.3%)  | 1211  | 1 (ref)     | -                   | -            |  | -           | -                   | -           |
|           | Anti-MAA-        | 77 (78.6%)      | 21 (21.4%)   | 98    | 0.95        | (0.58, 1.57)        | 0.84         |  | 1 (ref)     | -                   | -           |
|           | Anti-MAA+        | 22 (71.0%)      | 9 (29.0%)    | 31    | 1.43        | (0.65, 3.13)        | 0.38         |  | 1.50        | (0.60, 3.74)        | 0.38        |
|           |                  | HLA-DRB1.03-    | HLA-DRB1.03+ | Total | OR          | 95%CI               | p-value      |  | OR          | 95%CI               | p-value     |
| Anti-AGE+ | Healthy controls | 941 (77.7%)     | 270 (22.3%)  | 1211  | 1 (ref)     | -                   | -            |  | -           | -                   | -           |
|           | Anti-MAA-        | 20 (55.6%)      | 16 (44.4%)   | 36    | <b>2.79</b> | <b>(1.43, 5.46)</b> | <b>0.003</b> |  | 1 (ref)     | -                   | -           |
|           | Anti-MAA+        | 50 (61.7%)      | 31 (38.5%)   | 81    | <b>2.16</b> | <b>(1.35, 3.45)</b> | <b>0.001</b> |  | 0.78        | (0.35, 1.72)        | 0.53        |
|           |                  | HLA-DRB1*03-    | HLA-DRB1*03+ | Total | OR          | 95%CI               | p-value      |  | OR          | 95%CI               | p-value     |
| Anti-MAA- | Healthy controls | 941 (77.7%)     | 270 (22.3%)  | 1211  | 1 (ref)     | -                   | -            |  | -           | -                   | -           |
|           | Anti-AGE-        | 77 (78.6%)      | 21 (21.4%)   | 98    | 0.95        | (0.58, 1.57)        | 0.84         |  | 1 (ref)     | -                   | -           |
|           | Anti-AGE+        | 20 (55.6%)      | 16 (44.4%)   | 36    | <b>2.79</b> | <b>(1.43, 5.46)</b> | <b>0.003</b> |  | <b>2.93</b> | <b>(1.30, 6.63)</b> | <b>0.01</b> |
|           |                  | HLA-DRB1.03-    | HLA-DRB1.03+ | Total | OR          | 95%CI               | p-value      |  | OR          | 95%CI               | p-value     |
| Anti-MAA+ | Healthy controls | 941 (77.7%)     | 270 (22.3%)  | 1211  | 1 (ref)     | -                   | -            |  | -           | -                   | -           |
|           | Anti-AGE-        | 22 (71.0%)      | 9 (29.0%)    | 31    | 1.43        | (0.65, 3.13)        | 0.38         |  | 1 (ref)     | -                   | -           |
|           | Anti-AGE+        | 50 (61.7%)      | 31 (38.5%)   | 81    | <b>2.16</b> | <b>(1.35, 3.45)</b> | <b>0.001</b> |  | 1.52        | (0.62, 3.71)        | 0.36        |

Results are presented as n (%) and OR (95% confidence interval)

Statistically significant difference between patient group and healthy controls ( $p \leq 0.05$ )

Abbreviations: AGE, advanced glycation end-product; MAA, malondialdehyde-acetaldehyde adduct; HC, Healthy controls; RA rheumatoid arthritis.

**Supplementary Table 3.** Association anti-PTM responses with ESR and CRP cross stratified for anti-AGE and anti-MAA for RA and non-RA arthritis.

| RA                           | Anti-AGE-            |                     |                  | Anti-AGE+             |                      |              | Anti-MAA-           |                       |                  | Anti-MAA+           |                     |         |
|------------------------------|----------------------|---------------------|------------------|-----------------------|----------------------|--------------|---------------------|-----------------------|------------------|---------------------|---------------------|---------|
|                              | Anti-MAA-<br>n=267   | Anti-MAA+<br>n=89   | p-value          | Anti-MAA-<br>n=79     | Anti-MAA+<br>n=208   | p-value      | Anti-AGE-<br>n=267  | Anti-AGE+<br>n=79     | p-value          | Anti-AGE-<br>n=89   | Anti-AGE+<br>n=208  | p-value |
| <b>ESR<br/>(median, IQR)</b> | 30.0<br>(16.0-49.0)  | 41.0<br>(22.5-57.0) | <b>0.009</b>     | 30.0<br>(18.0-47.0)   | 41.0<br>(20.0-64.8)  | <b>0.010</b> | 30.0<br>(16.0-49.0) | 30.0<br>(18.0-47.0)   | 0.83             | 41.0<br>(22.5-57.0) | 41.0<br>(20.0-64.8) | 0.72    |
| <b>CRP<br/>(median, IQR)</b> | 15.0<br>(6.0-33.0)   | 24.0<br>(10.0-41.8) | <b>0.008</b>     | 12.0<br>(8.0-29.0)    | 22.0<br>(9.8-52.3)   | <b>0.005</b> | 15.0<br>(6.0-33.0)  | 12.0<br>(8.0-29.0)    | 0.81             | 24.0<br>(10.0-41.8) | 22.0<br>(9.8-52.3)  | 0.77    |
|                              |                      |                     |                  |                       |                      |              |                     |                       |                  |                     |                     |         |
| non-RA                       | Anti-AGE-            |                     |                  | Anti-AGE+             |                      |              | Anti-MAA-           |                       |                  | Anti-MAA+           |                     |         |
|                              | Anti-MAA-<br>n= 302* | Anti-MAA+<br>n=54*  | p-value          | Anti-MAA-<br>n=68*    | Anti-MAA+<br>n=109*  | p-value      | Anti-AGE-<br>n=302* | Anti-AGE+<br>n=68*    | p-value          | Anti-AGE-<br>n=54*  | Anti-AGE+<br>n=109* | p-value |
| <b>ESR<br/>(median, IQR)</b> | 17.5<br>(8.0-36.0)   | 38.5<br>(23.0-63.5) | <b>&lt;0.001</b> | 31.0<br>(14.0 – 55.8) | 42.00<br>(27.0-60.5) | <b>0.05</b>  | 17.5<br>(8.0-36.0)  | 31.0<br>(14.0 – 55.8) | <b>&lt;0.001</b> | 38.5<br>(23.0-63.5) | 42.0<br>(27.0-60.5) | 0.59    |
| <b>CRP<br/>(median, IQR)</b> | 9.0<br>(3.0-25.8)    | 21.0<br>(9.0-44.0)  | <b>&lt;0.001</b> | 15.9<br>(5.0- 48.3)   | 21.0<br>(8.7-55.5)   | 0.09         | 9.0<br>(3.0-25.8)   | 15.9<br>(5.0- 48.3)   | <b>0.05</b>      | 21.0 (9.0-44.0)     | 21.0 ( 8.7-55.5)    | 0.66    |

Results are presented as median (IQR)

\*ESR and CRP levels were not determined for all patients and numbers might therefore slightly differ per variable

Statistically significant difference between groups (p≤0.05)

Abbreviations: AGE, Advanced Glycation End-products; CRP, C-reactive protein; ESR, erythrocyte sedimentation rate; IQR, interquartile range; MAA, Malondialdehyde Acetaldehyde Adducts; RA, rheumatoid arthritis.

**Supplementary Figure 1. Presence of anti-MAA or anti-AGE is not associated with SDFR in RA patients (n=624).** (A) Kaplan Meier curves presenting percentage remission in anti-AGE positive and -negative RA. (B) left panel: percentage remission in anti-MAA positive and -negative RA. Right panel: data stratified for CCP2 status. The number of patients entering the time interval is shown under each graph. *Abbreviations: AGE, Advanced Glycation End-product; CarP, Carbamylated Protein; CCP2, citrullinated cyclic peptide 2; MAA, Malondialdehyde-Acetaldehyde Adduct.*

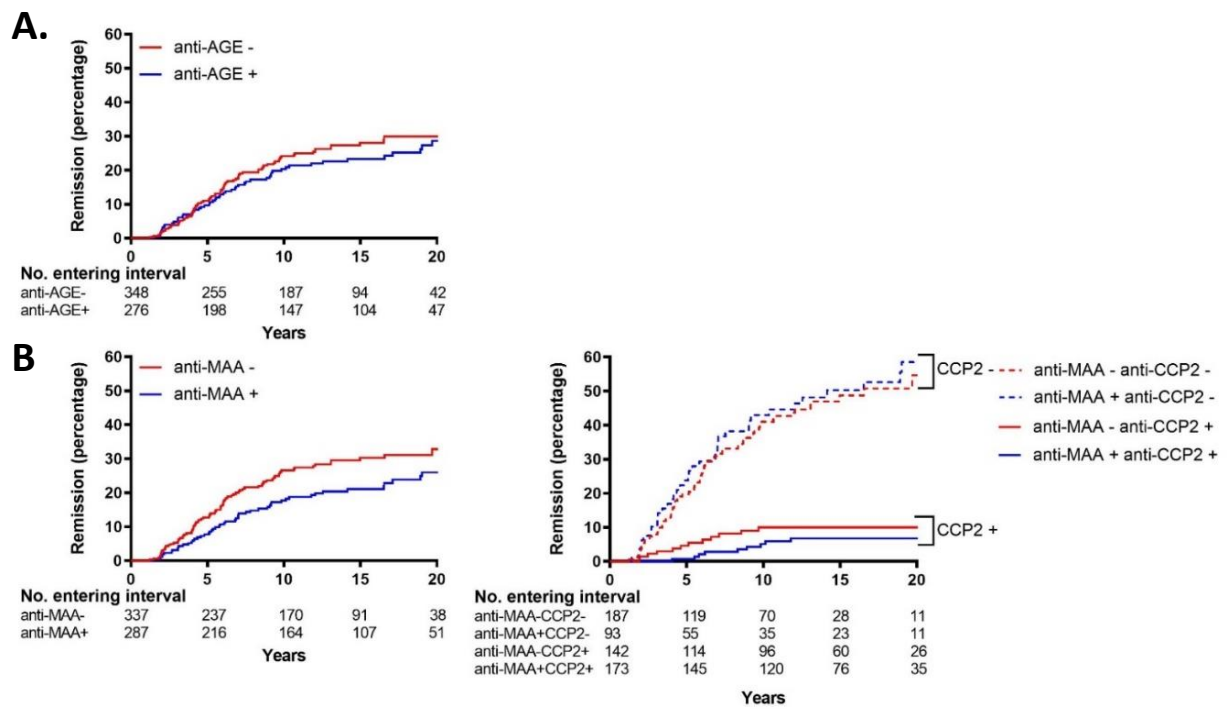

Supplement: inline-supplementary-material-1 [file inline-supplementary-material-1.pdf]
